# Supplementary material for: Group 3 Innate Lymphoid Cells Protect the Host from the Uropathogenic Escherichia coli Infection in the Bladder
Source: PubMed Central journal article supplement (PMC8867143; doi:10.1002/advs.202103303), 2022-01-12
Supplement: ADVS-9-2103303-s001.pdf [file ADVS-9-2103303-s001.pdf]

## Supporting Information

for *Adv. Sci.*, DOI: 10.1002/advs.202103303

Group 3 Innate Lymphoid Cells Protects the Host from  
the Uropathogenic *Escherichia coli* Infection in the  
Bladder

*Jiaoyan Huang, Liuhui Fu, Jida Huang, Jie Zhao, Xin Zhang,  
Wenyan Wang, Yeyang Liu, Bowen Sun, Ju Qiu, Xiaoyu Hu,  
Zhihua Liu, and Xiaohuan Guo\**

# Supporting Information

## **Group 3 Innate Lymphoid Cells Protect the Host from the Uropathogenic *Escherichia coli* Infection in the Bladder**

*Jiaoyan Huang, Lihui Fu, Jida Huang, Jie Zhao, Xin Zhang, Wenyan Wang, Yeyang Liu, Bowen Sun, Ju Qiu, Xiaoyu Hu, Zihua Liu, Xiaohuan Guo\**

### **The Supplementary Materials include:**

**Figure S1.** Distribution of ILC subsets in the kidney.

**Figure S2.** Both commensal and sex did not influence the maintenance of kidney-resident ILCs.

**Figure S3.** Bladder ILC2 is not required for the early elimination of UPEC.

**Figure S4.** RAG-deficient mice exhibit increased ILC3 response in the bladder.

**Figure S5.** IL-22 blockade or supplementation effectively regulated the expression of antimicrobial peptides in the gut.

**Table S1.** Antibodies used for flow cytometry.

**Table S2.** Primer sequences used for real-time RT-PCR.

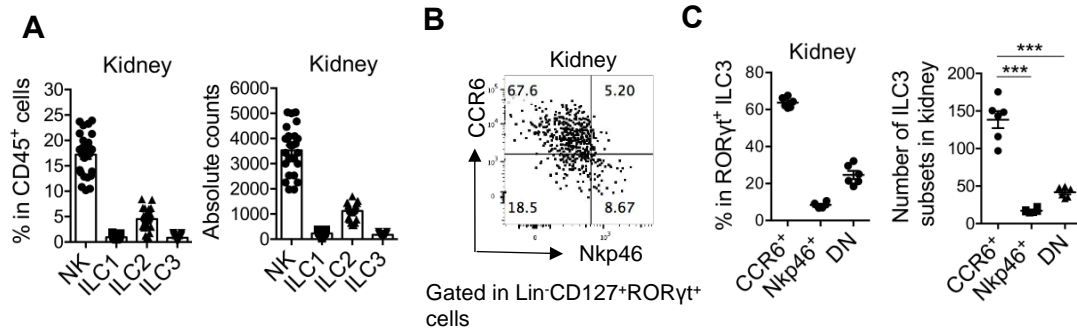

**Figure S1. Distribution of ILC subsets in the kidney.**

A) The percentages in CD45<sup>+</sup> cells and absolute numbers of different ILC subsets from the kidney of WT mice are shown (n=25 mice). Data shown are representative of five independent experiments. B) Representative plot shows CCR6 and Nkp46 expression on the RORγt<sup>+</sup> ILC3 in the kidney of WT mice. C) The percentages in total RORγt<sup>+</sup> ILC3 and absolute numbers of ILC3 subsets (CCR6<sup>+</sup>, Nkp46<sup>+</sup> and CCR6<sup>-</sup>Nkp46<sup>-</sup> cells) from the kidney of WT mice are shown (n=6 mice). Data are pooled from two independent experiments. Data are shown as the mean ± SEM. One-way ANOVA test (C) was used for statistical analysis, \*\*\*\*p<0.001. Each dot represents one individual mouse.

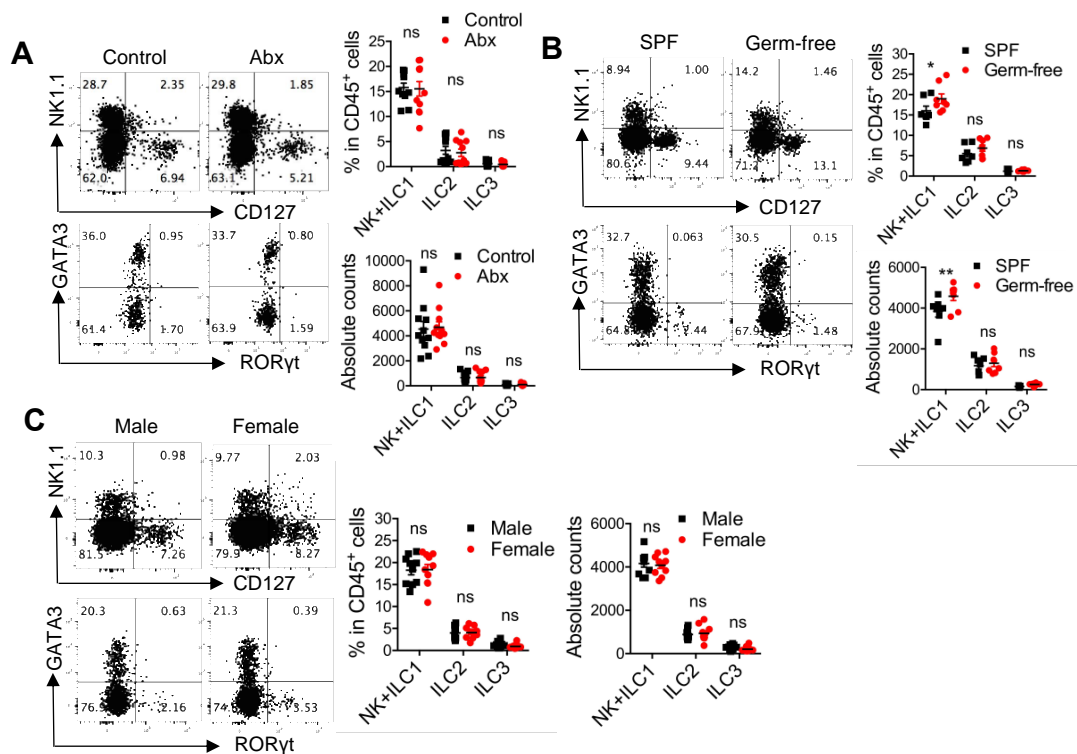

**Figure S2. Both commensal and sex did not influence the maintenance of kidney-resident ILCs.**

A) Representative plots, percentages and absolute numbers of different ILC subsets in the kidney of the antibiotics-treated (Abx) mice and the control C57BL/6 mice are shown (n=11 mice). B) Representative plots, percentages and absolute numbers of different ILC subsets in the kidney of germ-free mice and SPF C57BL/6 mice at the same age are shown (n=8 mice). C) Representative plots, percentages and absolute numbers of different ILC subsets in the kidney of male and female C57BL/6 mice at the same age are shown (n=10 mice). Mice in these experiments are adult. Data are pooled from two independent experiments, and shown as mean  $\pm$  SEM. Two-way ANOVA followed by Bonferroni test was conducted for statistical analysis. \* $p < 0.05$ , \*\* $p < 0.01$ ; ns, no significant difference.

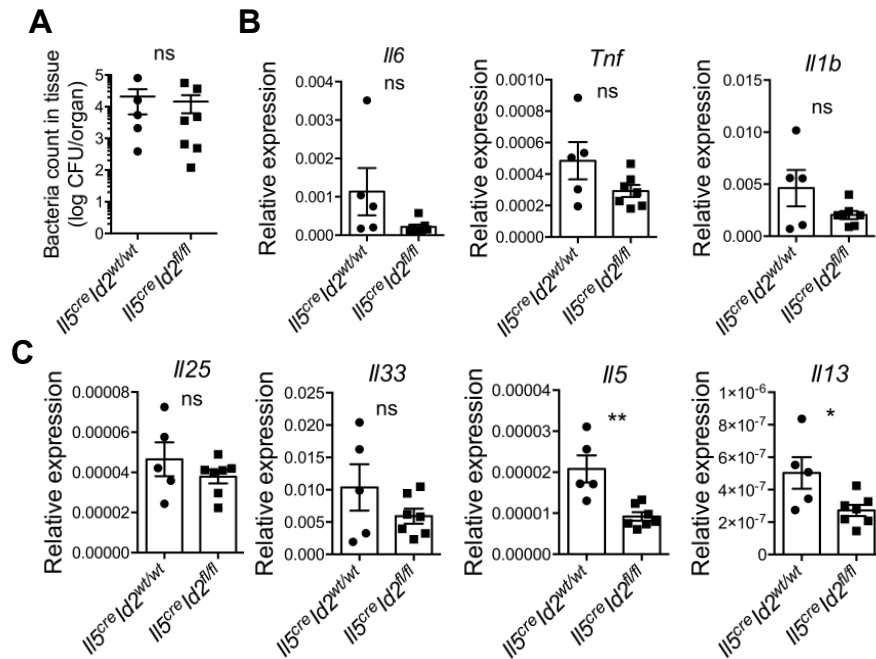

**Figure S3. Bladder ILC2 is not required for the early elimination of UPEC.**

8 weeks-old *I15<sup>tdtomato-cre</sup>Id2<sup>wt/wt</sup>* and *I15<sup>tdtomato-cre</sup>Id2<sup>fl/fl</sup>* female mice were transurethrally infected with  $1 \times 10^8$  CFU of UPEC. The bladder tissues at 18h post treatment was isolated. A) The UPEC burdens in the whole bladder tissue are shown (n=5-7 mice). B) The mRNA expression of the indicated pro-inflammation cytokines in the infected bladder tissues are shown (n=5-7 mice). C) The mRNA expression of the indicated type 2 cytokines in the infected bladder tissues are shown (n=5-7 mice). Data are representative of three independent experiments. Error bars represent the mean  $\pm$  SEM. Unpaired two-tails student's *t*-test was used for statistical analysis, \* $p < 0.05$ , \*\* $p < 0.01$ ; ns, no significant difference.

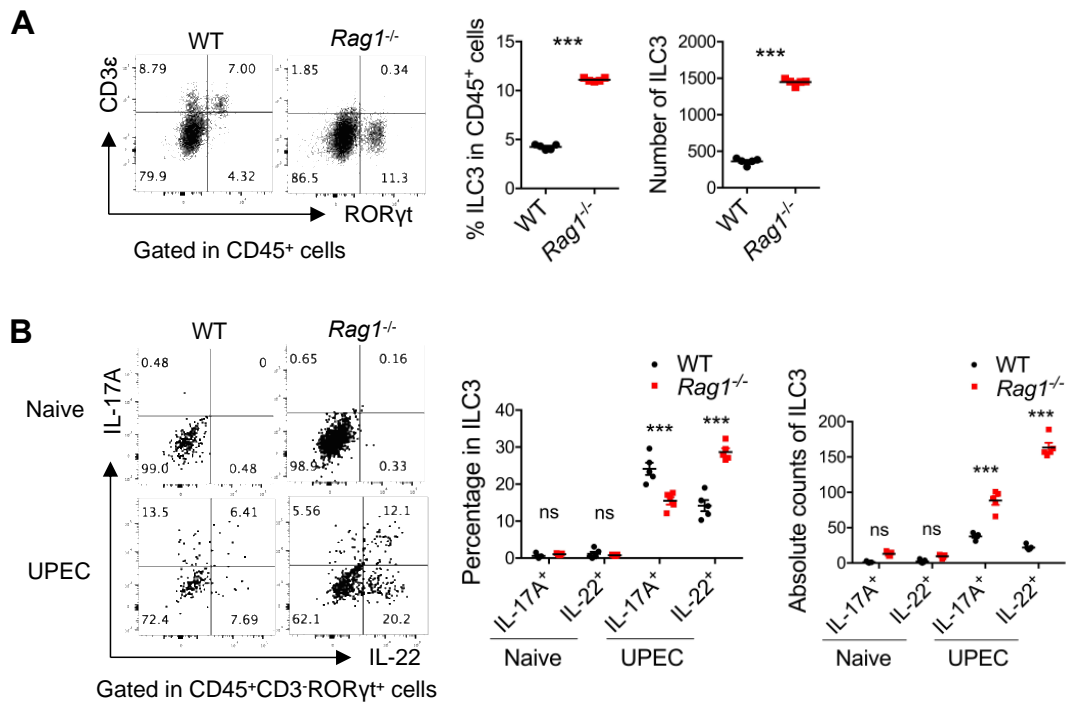

**Figure S4. RAG-deficient mice exhibit increased ILC3 response in the bladder.**

A) Representative plots, percentages and absolute numbers of ILC3 (CD45<sup>+</sup>CD3ε<sup>-</sup>RORγt<sup>+</sup> cells) in the bladder of naïve WT and *Rag1*<sup>-/-</sup> mice are shown (n=5 mice). B) 8 weeks-old WT and *Rag1*<sup>-/-</sup> female mice were transurethrally infected with 1\*10<sup>8</sup> CFU of UPEC for 18 h. The naïve and UPEC-infected bladder tissues were digested and cells were treated with Brefeldin A (0.5μg/ml) for 3 h. IL-22 and IL-17A expression in the RORγt<sup>+</sup> ILC3 were analyzed by intracellular cytokine staining. Representative plots, percentages and absolute numbers of these cytokines-producing cells are shown (n=5 mice). Data are representative of two independent experiments, and shown as mean ± SEM. Unpaired two-tails student's *t*-test (A) and Two-way ANOVA followed by Bonferroni test (B) was conducted for statistical analysis. \*\*\*p<0.001; ns, no significant difference.

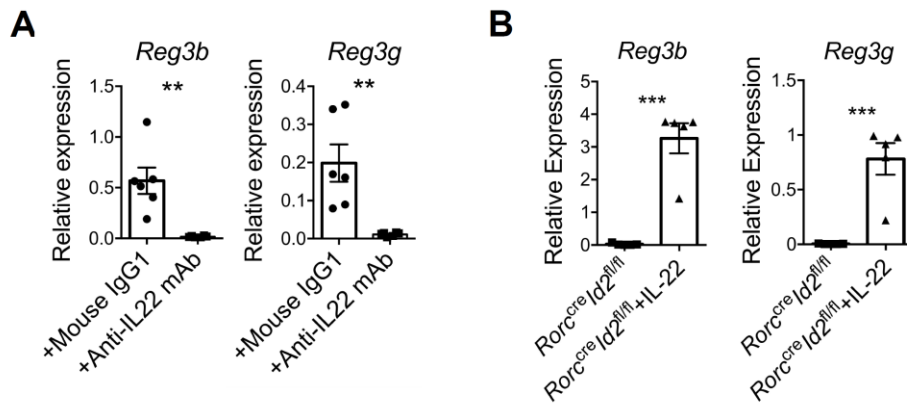

**Figure S5. IL-22 blockade or supplementation effectively regulated the expression of antimicrobial peptides in the gut.**

A) Related to Figure 7A, 8 weeks-old WT female mice were intraperitoneally injected with anti-IL-22 mAb or mouse IgG1 (200 $\mu$ g per mouse each time). The mRNA expression of *Reg3b* and *Reg3g* in the gut of these mice was detected (n=6 mice). B) Related to Figure 7B, 8 weeks-old *Rorc<sup>cre</sup> Id2<sup>fl/fl</sup>* female mice were intravenously injected with IL-22-Fc (500ng) or PBS. The mRNA expression of *Reg3b* and *Reg3g* in the gut of these mice was detected (n=5 mice). Data are representative of two independent experiments. Error bars represent the mean  $\pm$  SEM. Unpaired two-tails student's *t*-test (A) and One-way ANOVA test (B) was used for statistical analysis, \*\*p<0.01, \*\*\*p<0.001.

**Table S1. Antibodies used for flow cytometry.**

| <b>Antibodies</b>                                                      | <b>Source</b>               | <b>Identifier</b>                   |
|------------------------------------------------------------------------|-----------------------------|-------------------------------------|
| FITC anti-mouse CD3 $\epsilon$ (Clone 145-2C11)                        | Biolegend                   | Cat# 100306; RRID:<br>AB_312671     |
| APC anti-mouse CD3 $\epsilon$ (Clone 500A2)                            | Biolegend                   | Cat# 152306; RRID:<br>AB_2632669    |
| Biotin anti-mouse CD3 $\epsilon$ (Clone 145-2C11)                      | Biolegend                   | Cat# 100304; RRID:<br>AB_312669     |
| Brilliant Violet 605 <sup>TM</sup> anti-mouse CD4<br>(Clone GK1.5)     | Biolegend                   | Cat# 100451; RRID:<br>AB_2564591    |
| Biotin anti-mouse CD4 (Clone GK1.5)                                    | Biolegend                   | Cat# 100404; RRID:<br>AB_312689     |
| Alexa Fluor <sup>®</sup> 700 anti-mouse CD8a (Clone<br>53-6.7)         | Biolegend                   | Cat# 100730; RRID:<br>AB_493703     |
| Biotin anti-mouse CD8a (Clone 53-6.7)                                  | Biolegend                   | Cat# 100704; RRID:<br>AB_312743     |
| Alexa Fluor <sup>®</sup> 700 anti-mouse CD45 (Clone<br>30-F11)         | Biolegend                   | Cat# 103128; RRID:<br>AB_493715     |
| Alexa Fluor <sup>®</sup> 700 anti-mouse CD45.2<br>(Clone 104)          | Thermo Fisher<br>Scientific | Cat# 56-0454-82; RRID:<br>AB_657752 |
| FITC anti-mouse CD90.2 (Clone 30-H12)                                  | Biolegend                   | Cat# 105306; RRID:<br>AB_313177     |
| Brilliant Violet 510 <sup>TM</sup> anti-mouse CD90.2<br>(Clone 53-2.1) | Biolegend                   | Cat# 140319; RRID:<br>AB_2561395    |
| PE anti-mouse CD127 (Clone SB/199)                                     | Biolegend                   | Cat# 121112; RRID:<br>AB_493509     |
| Brilliant Violet 421 <sup>TM</sup> anti-mouse CD127<br>(Clone A7R34)   | Biolegend                   | Cat# 135027; RRID:<br>AB_2563103    |
| Brilliant Violet 605 <sup>TM</sup> anti-mouse Ly-6G<br>(Clone 1A8)     | Biolegend                   | Cat# 127639; RRID:<br>AB_2565880    |
| Alexa Fluor 700 anti-mouse Ly-6c Antibody<br>(Clone HK1.4)             | Biolegend                   | Cat# 128024; RRID:<br>AB_10643270   |
| Biotin anti-mouse Ly-6c/Ly-6c (Gr-1)<br>(Clone RB6-8C5)                | Biolegend                   | Cat# 108404; RRID:<br>AB_313369     |
| Biotin anti-mouse/human CD45R/B220<br>(Clone RA3-6B2)                  | Biolegend                   | Cat# 103204; RRID:<br>AB_312989     |
| PerCP/Cyanine5.5 anti-mouse NK-1.1<br>(Clone PK136)                    | Biolegend                   | Cat# 108728; RRID:<br>AB_2132705    |
| Biotin anti-mouse NK-1.1 (Clone PK136)                                 | Biolegend                   | Cat# 108704; RRID:<br>AB_313391     |
| APC anti-mouse NKP46 Antibody (Clone<br>29A1.4)                        | Biolegend                   | Cat# 137608; RRID:<br>AB_10612758   |



|                                                                                  |                          |                                    |
|----------------------------------------------------------------------------------|--------------------------|------------------------------------|
| Biotin anti-mouse TCR $\beta$ (Clone H57-597)                                    | Thermo Fisher Scientific | Cat# 13-5961-82; RRID: AB_466819   |
| Biotin anti-mouse TCR $\gamma\delta$ (Clone GL3)                                 | Thermo Fisher Scientific | Cat# 13-5711-82; RRID: AB_466668   |
| Biotin anti-mouse TER-119/Erythroid Cells (TER-119)                              | Biolegend                | Cat# 116204; RRID: AB_313705       |
| APC anti-mouse IL-33R $\alpha$ (IL1RL1, ST2) (Clone DIH9)                        | Biolegend                | Cat# 145306; RRID: AB_2561917      |
| APC anti-mouse CCR6 Antibody (Clone 29-2L17)                                     | Biolegend                | Cat# 129813; RRID: AB_1877148      |
| Alexa Fluor 488 anti-mouse CCR7 Antibody (Clone 4B12)                            | Biolegend                | Cat# 120110; RRID: AB_492841       |
| PE anti-mouse CXCR6 Antibody (Clone K041E5)                                      | Biolegend                | Cat# 151104; RRID: AB_2566546      |
| FITC anti-mouse CD25 Antibody (Clone 3C7)                                        | Biolegend                | Cat# 101908; RRID: AB_961212       |
| eFluor 660 anti-mouse IL-25R Antibody (Clone MUNC33)                             | eBioscience              | Cat# 50-7361-82; RRID: AB_2574289  |
| APC/Cy7 anti-mouse Sca-1 Antibody (Clone D7)                                     | Biolegend                | Cat# 108126; RRID: AB_10645327     |
| PerCP/Cy5.5 anti-mouse c-Kit Antibody (Clone 2B8)                                | Biolegend                | Cat# 105824; RRID: AB_2131597      |
| Pacific Blue anti-mouse I-A/I-E Antibody (Clone M5/114.15.2)                     | Biolegend                | Cat# 107620; RRID: AB_493527       |
| Biotin anti-mouse RANK Antibody (Clone R12-31)                                   | Biolegend                | Cat# 119803; RRID: AB_2205355      |
| PerCP/Cy5.5 anti-mouse PD1 Antibody (Clone 29F.1A12)                             | Biolegend                | Cat# 135208; RRID: AB_2159184      |
| Biotin anti-mouse PD-L1 Antibody (Clone 10F.9G2)                                 | Biolegend                | Cat# 124306; RRID: AB_961220       |
| APC anti-mouse Integrin $\alpha 4\beta 7$ Antibody (Clone DATK32)                | Biolegend                | Cat# 120608; RRID: AB_10730607     |
| Alexa Fluor <sup>®</sup> 647 Mouse IgG2a, $\kappa$ Isotype Ctrl (Clone MOPC-173) | Biolegend                | Cat# 400240                        |
| Alexa Fluor <sup>®</sup> 488 Mouse IgG1, $\kappa$ Isotype Ctrl (Clone MOPC-21)   | Biolegend                | Cat# 400134                        |
| PE anti-mouse/human GATA3 (Clone TWAJ)                                           | Thermo Fisher Scientific | Cat# 12-9966-42; RRID: AB_1963600  |
| eFluor 660 anti-mouse/human GATA3 (Clone TWAJ)                                   | Thermo Fisher Scientific | Cat# 50-9966-42; RRID: AB_10596663 |
| PerCP-eFluor 710 anti-mouse ROR $\gamma$ t Antibody (Clone B2D)                  | eBioscience              | Cat# 46-6981-82; RRID: AB_10717956 |

---

|                                                            |                          |                                    |
|------------------------------------------------------------|--------------------------|------------------------------------|
| PE/Cy7 anti-mouse T-bet Antibody (Clone 4B10)              | eBioscience              | Cat# 25-5825-82; RRID: AB_11042699 |
| Brilliant Violet 421™ anti-mouse/human IL-5 (Clone TRFK5)  | Biolegend                | Cat# 504311; RRID: AB_2563161      |
| Alexa Fluor® 488 anti-mouse IL-13 (Clone eBio13A)          | Thermo Fisher Scientific | Cat# 53-7133-82; RRID: AB_2016708  |
| PE anti-mouse IL-17A (Clone TC11-18H10.1)                  | Biolegend                | Cat# 506904; RRID: AB_315464       |
| FITC anti-mouse TNF $\alpha$ Antibody (Clone MP6-XT22)     | Biolegend                | Cat# 506304; RRID: AB_315425       |
| eFluor 450 anti-mouse IFN $\gamma$ Antibody (Clone XMG1.2) | eBioscience              | Cat# 48-7311-82; RRID: AB_1834366  |
| PerCP-eFluor 710 anti-mouse IL-22 Antibody (Clone IL22JOP) | eBioscience              | Cat# 46-7222-82; RRID: AB_2573839  |
| PE anti-mouse GM-CSF Antibody (Clone MP1-22E9)             | BD                       | Cat# 554406                        |

---

**Table S2. Primer sequences used for real-time RT-PCR.**

| <b>Gene</b>    | <b>Forward primer</b>     | <b>Reverse primer</b>    |
|----------------|---------------------------|--------------------------|
| <i>Actb</i>    | AAGTGTGACGTTGACATCCG      | GATCCACATCTGCTGGAAGG     |
| <i>Ii1b</i>    | GAAATGCCACCTTTTGACAGTG    | TGGATGCTCTCATCAGGACAG    |
| <i>Ii5</i>     | CCCACGGACAGTTTGATTCT      | GCAATGAGACGATGAGGCTT     |
| <i>Ii6</i>     | TAGTCCTTCCCTACCCCAATTTCC  | TTGGTCCTTAGCCACTCCTTC    |
| <i>Ii12p35</i> | CACCCTTGCCCTCCTAAACC      | CACCTGGCAGGTCCAGAGA      |
| <i>Ii13</i>    | TCTGAAGGACTCTGGCTTTG      | GATGGATGCTACCAAACCTGGA   |
| <i>Ii18</i>    | GACTCTTGCGTCAACTTCAAGG    | CAGGCTGTCTTTTGTCAACGA    |
| <i>Ii17a</i>   | CTCCAGAAGGCCCTCAGACTAC    | AGCTTTCCTCCGCATTGACACAG  |
| <i>Ii22</i>    | CATGCAGGAGGTGGTACCTT      | CAGACGCAAGCATTCTCAG      |
| <i>Ii23p19</i> | GGTGGCTCAGGGAAATGT        | GACAGAGCAGGCAGGTACAG     |
| <i>Ii25</i>    | ACAGGGACTTGAATCGGGTC      | TGGTAAAGTGGGACGGAGTTG    |
| <i>Ii33</i>    | CCTCCCTGAGTACATAACAATGACC | GTAGTAGCACCTGGTCTTGCTCTT |
| <i>Ifng</i>    | GAGCTCATTGAATGCTTGGC      | GCGTCATTGAATCACACCTG     |
| <i>Tnfa</i>    | CCCTCACACTCAGATCATCTTCT   | GCTACGACGTGGGCTACAG      |
| <i>Csf2</i>    | GCAATTTACCAAACCTCAAGG     | CTCATTACGCAGGCACAAAAG    |
| <i>Cxcl1</i>   | GCCAATGAGCTGCGCTGTCAGTGC  | CTTGGGGACACCTTTTAGCATCTT |
| <i>Cxcl2</i>   | CCAACCACCAGGCTACAGG       | GCGTCACACTCAAGCTCTG      |
| <i>Ccl2</i>    | GTCCCTGTCATGCTTCTGG       | GCGTAACTGCATCTGGCT       |
